# Supplementary material for: Bandage Contact Lens Application Reduces Fibrotic Wound Healing of Flap Margins after FS-LASIK: A Prospective Randomized Clinical Trial
Source: J Ophthalmol. 2019 Jan 10;2019:3074659. doi: 10.1155/2019/3074659 (PMC6348804; doi:10.1155/2019/3074659)
Supplement: Supplementary Materials — The data used to support the findings of this study are included within the supplementary information file. [file 3074659.f1.xlsx]

## Sheet: Sheet1
姓名	性别	年龄	眼别	术前VA	术后第1天	术后3天	术后6月	术后6月	残余球镜	残余柱镜	SE	球镜	柱镜	切削厚度	角膜厚度	术前眼压	术后眼压		眼别	术前VA	术后第1天	术后3天	术后6月	术后6月	残余球镜	残余柱镜	SE	球镜	柱镜	切削厚度	角膜厚度	术前眼压	术后眼压
			术后置CL		UCVA	UCVA	UCVA	BCVA				术前	术前						术后未置CL		UCVA	UCVA	UCVA	BCVA				术前	术前
邹佳	M	23	OD	1.2	1	1	1.2	1.2	0.25	-0.25		-1.5	-1	67	531	18	11.5		OS	1.2	1	1	1.2	1.2	0	0		-2.25	0	53	535	18.7	14.8
蒋倩	F	18	OS	1.2	0.3	0.8	1.2	1.2	-0.25	0		-5	0	87	560	15.2	13.6		OD	1.2	1	1	1	1.2	-0.5	-0.25		-5	0	87	569	16.8	12.6
陈思达	M	21	OD	1.2	1	1	1.2	1.2	0.25	-0.25		-3.75	0	72	564	16.3	12.5		OS	1.2	1	1	1.2	1.2	0	-0.25		-3.75	0	72	563	14.3	12.9
王智能	M	20	OS	1	1	1	1.2	1.2	0.25	-0.25		-3.75	0	72	550	15.9	10.6		OD	1	0.8	1	1	1.2	0	-0.5		-4	0	75	545	18.8	8.7
梁熙	M	19	OD	1	0.6	0.8	1	1.2	-0.25	-0.5		-4.75	0	84	549	15.5	9.5		OS	1	1	1	1.2	1.2	0	0		-4.5	0	81	548	14.1	8.5
伍建宏	M	18	OS	1.2	0.6	1	1.5	1.5	0	0		-1.5	0	43	510	16.4	14.7		OD	1.5	1	1	1.5	1.5	0	-0.25		-1.5	0	43	515	17.9	15.1
吕想想	M	18	OD	1	1	1	1	1.2	-0.5	-0.25		-10.25	-0.5	132	536	16.6	6.7		OS	0.9	0.6	0.8	1	1.2	-0.25	-0.5		-10.75	-0.75	140	536	19	8.5
李俊杰	M	18	OS	1	1	1	1	1	0	0		-1.75	-0.5	64	561	18.8	12.7		OD	1	1	1	1	1	0	0		-4.5	0	81	564	20.1	10.3
黎健芳	F	19	OS	1	0.6	0.8	1	1.2	0	-0.5		-5.5	-0.5	93	504	12.3	7.4		OD	1	0.8	1	1	1.2	-0.5	-0.25		-4.5	-0.5	97	505	15.4	9.4
杨建设	M	18	OS	1	1	1	1	1	0.25	-0.5		-5	0	87	542	15.3	11		OD	1	1	1	1	1	0.5	0		-5.75	0	96	540	10.8	10
姜伟伟	M	25	OD	1	O.6	0.8	1	1	0.25	-0.25		-3.75	-0.5	80	552	15.8	10		OS	1	1	1	1	1	0	0		-3.75	-0.5	89	545	13.1	11.2
刘运英	F	33	OD	1	0.8	0.8	1	1	0.5	0		-2.75	-0.5	77	542	11.3	7		OS	1	1	1	1	1	0.25	0		-3	-0.5	80	536	10.8	7.2
马齐桂	M	19	OD	1	0.9	1	1	1	-0.25	0		-2	0	50	620	16.6	14.4		OS	1	1	1	1	1	0	0		-2	0	50	616	18.8	17.2
刘入綮	M	19	OD	1	1	1	1	1.2	-0.5	-0.25		-4.75	0	84	528	11.6	9.8		OS	1	1	1	1.2	1.2	-0.25	0		-4.75	0	84	525	17.8	11.6
唐蕾	F	28	OS	1	1	1	1	1.2	-0.5	-0.25		-3.5	-0.5	86	507	11.6	11.8		OD	1	1	1	1.2	1.2	0.25	-0.25		-3.5	0	69	507	8.8	9.4
闫虹霖	M	27	OS	1	0.5	0.8	1	1.2	0.5	-0.5		-4.75	-0.75	103	549	10.4	5.8		OD	1	0.8	1	1	1.2	-0.5	-0.5		-5.5	0	93	549	13.1	6.9
姚李兴	M	22	OS	1	1	1	1	1.2	0.5	-0.5		-2.5	-0.5	73	520	12.2	7.5		OD	1	1	1	1.2	1.2	0.25	0		-2.75	-0.5	76	510	13.8	8.4
唐文斌	M	27	OS	1	1	1	1	1	0.25	-0.5		-3.75	-0.5	88	542	10.5	7.4		OD	0.9	0.8	0.8	1	1	0.5	-0.25		-4.25	0	78	536	10.7	6.4
刘嘉俊	M	22	OS	1.2	0.5	0.8	1	1.2	-0.5	-0.25		-4	-1.25	101	533	18.5	13.2		OD	1.2	1	1	1.2	1.2	-0.25	-0.5		-3.75	-1	95	535	17	11.2
王雯	F	19	OD	1	1	1	1.2	1.2	0	-0.25		-6.25	0	101	560	16.9	10.6		OS	1	1	1	1.2	1.2	0	-0.5		-4.5	-0.75	101	567	16.8	12.3
唐奇威	M	21	OS	1	1	1	1	1.2	-0.25	-0.25		-8.75	0	129	585	19.5	14.4		OD	0.8	1	1	0.9	1	-0.5	-0.25		-10.25	0	145	590	19.5	15.4
韦馨丽	F	19	OS	1.2	1	1	1.2	1.2	0	0		-2.25	0	53	553	15.1	13.3		OD	1.2	1	1	1.2	1.2	0	0		-2.75	0	59	579	14	13.1
邓兴隆	M	19	OS	1	0.6	1	1	1	0	0		-2.75	0	59	501	11.6	9.3		OD	1	1	1	1	1	0	0		-3.75	-0.5	89	498	11.3	7.9
王俊斌	M	29	OD	1.2	1	1	1.2	1.2	-0.25	0		-4.25	-0.5	76	500	13.7	11.5		OS	1.2	1	1	1.2	1.2	0.25	-0.25		-3.75	-1.25	97	499	13.9	9.6
濮新恒	M	21	OS	1	0.8	1	1	1	0	0		-2.75	-1	80	555	14.5	11.5		OD	1	0.8	0.8	1	1	0.25	-0.25		-3.5	-0.5	86	543	14.9	9.2
伍秀梅	F	23	OD	1.2	1	1	1	1.2	-0.5	-0.25		-5	0	87	528	14	10		OS	1.2	1	1	1	1.2	0.25	-0.5		-5	0	87	532	16.9	10.7
曽小栩	F	31	OD	1.2	1	1	1.2	1.2	0	0		-3.5	0	69	512	15.7	9		OS	1.2	1	1	1.2	1.2	0	0		-3.25	0	66	528	16.8	9
杨雪	F	25	OD	1.5	0.9	1	1.2	1.2	0.25	0		-5	0	87	543	14.6	6.8		OS	1.5	0.8	1	1.2	1.2	0.5	0		-5	0	87	541	13.3	7.2
潘鸿丹	F	19	OD	1	0.8	0.8	1	1	0	0		-4.5	0	81	510	13.5	7.1		OS	1	1	1	1	1	0	0		-4.5	0	81	511	15.6	7.3
盛小敏	F	20	OS	1.2	1	1	1	1.2	-0.25	-0.5		-5.5	-0.5	93	500	16.6	10.6		OD	1.2	1	1	1	1.2	0	-0.5		-5.75	0	96	513	17.5	10.1
冯夏莹	F	23	OD	1	1	1	1.2	1.2	0.25	-0.5		-4.75	-1.25	109	542	15.4	10.3		OS	1	0.8	0.8	1.2	1.2	-0.25	-0.25		-5	-1.75	118	542	17	10.5
蒋恒	M	28	OS	1	0.8	1	1	1.2	-0.5	0		-7.75	0	100	519	15.8	10.4		OD	1	1	1	1	1.2	-0.75	0		-7.75	0	98	511	13.8	9.9
周亚梅	F	25	OD	1	1	1	1	1.2	0.25	-0.5		-5	-1.25	95	524	18	12.9		OS	1	0.8	1	1	1	0.25	0		-5.25	-0.75	92	537	18.5	11.1
刘斌艳	F	18	OS	1.5	0.8	1	1.2	1.2	0	0		-4.25	0	78	547	16.6	8.9		OD	1.5	0.8	0.8	1.2	1.5	0	-0.5		-4.25	0	78	548	16.6	9.3
杨智帆	M	20	OS	1	0.8	1	1	1	0.5	0		-4.25	0	78	520	20.4	11.1		OD	1	1	1	1	1	0.25	0		-4.25	0	78	528	18.9	10.2
陈川	M	19	OD	1	0.6	0.8	1	1	0	-0.25		-2.75	0	59	545	9.7	10.3		OS	1	0.8	1	1	1	-0.25	-0.25		-2.5	-0.75	76	544	10.6	11.5
袁冬梅	F	32	OD	1	1	1	1	1	-0.25	-0.25		-4.75	0	81	539	14.5	11.5		OS	1	1	1	1	1	0	-0.25		-4.5	0	97	541	11.7	8.1
张琼方	F	26	OD	1	0.6	0.8	1	1	0	0		-5.25	0	82	500	14	7.2		OS	1	0.6	0.8	1	1	0	0		-5	0	79`	495	14.2	9.1
黄港锋	M	19	OS	1	0.6	0.8	1	1.2	0	-0.5		-3.75	-1.25	98	512	14.6	8.6		OD	1	1	1	1	1.2	-0.5	0		-3.5	-1	92	513	15.2	9.9
龙桂宁	F	25	OS	1	0.6	1	1	1.2	0.25	-0.5		-4.75	-2	101	550	18	10.5		OD	1	0.8	1	1	1	0.25	0		-4.75	-2	101	543	17	11.4
郝悦	F	29	OD	1.2	0.8	1	1.2	1.2	0.5	0		-4.5	0	81	543	7.7	5.5		OS	1.2	0.6	0.8	1.2	1.2	0.5	0		-3.5	-0.75	89	537	8.4	5.5

## Sheet: Sheet2
		疼痛		异物感		畏光		流泪
		BCL组	对照组	BCL组	对照组	BCL组	对照组	BCL组	对照组
邹佳	1	1	0	1	0	1	1	1	0
蒋倩	2	2	1	1	0	1	2	2	1
陈思达	3	1	0	1	0	1	1	1	1
王智能	4	0	0	0	1	1	2	0	1
梁熙	5	0	1	1	0	1	1	1	1
伍建宏	6	1	0	1	0	1	1	2	1
吕想想	7	1	2	2	1	1	1	1	2
李俊杰	8	0	2	1	0	1	2	1	2
黎健芳	9	0	0	1	0	1	1	0	1
杨建设	10	0	1	0	1	1	2	0	1
姜伟伟	11	0	1	1	0	1	1	0	1
刘运英	12	0	2	1	0	1	1	0	1
马齐桂	13	3	1	2	1	2	1	1	0
刘入綮	14	0	1	0	1	1	1	0	1
唐蕾	15	0	0	1	0	2	2	1	1
闫虹霖	16	1	3	1	1	2	2	2	3
姚李兴	17	1	0	1	0	1	1	1	0
唐文斌	18	2	2	1	0	1	2	2	1
刘嘉俊	19	1	0	1	0	1	1	1	1
王雯	20	0	0	0	2	1	2	0	1
唐奇威	21	1	2	1	0	1	2	1	2
韦馨丽	22	1	0	1	0	1	1	1	0
邓兴隆	23	0	1	1	0	1	2	2	1
王俊斌	24	1	0	1	0	1	1	1	1
濮新恒	25	0	0	0	1	1	2	0	1
伍秀梅	26	0	1	1	0	1	1	1	1
曽小栩	27	1	0	1	0	1	1	2	1
杨雪	28	1	2	2	1	1	1	1	2
潘鸿丹	29	0	2	1	0	1	2	1	2
盛小敏	30	0	1	1	0	1	1	0	1
冯夏莹	31	0	2	0	1	1	2	0	1
蒋恒	32	0	1	1	0	1	1	0	1
周亚梅	33	0	2	1	0	1	1	0	1
刘斌艳	34	2	1	2	1	2	1	1	0
杨智帆	35	0	1	0	1	1	1	0	1
陈川	36	0	1	1	0	2	2	1	1
袁冬梅	37	1	3	1	1	2	2	1	2
张琼方	38	1	0	1	0	1	1	1	0
黄港锋	39	0	1	1	0	1	2	2	1
龙桂宁	40	1	0	1	0	1	1	1	1
郝悦	41	0	2	0	2	1	2	0	1
